# Supplementary material for: Overoxidized polypyrrole/overoxidized poly(3,4-ethylenedioxythiophene)/graphene quantum dots-chitosan as enhanced electrochemical sensing platform for luteolin determination in peanut shells
Source: Royal Society of Chemistry journal article supplement (doi:10.1039/d2nj03738f), 2022-01-01
Supplement: d2nj03738f1.pdf [file d2nj03738f1.pdf]

## Supporting material

Overoxidized polypyrrole / overoxidized poly(3, 4-  
ethylenedioxythiophene) / graphene quantum dots-chitosan as enhanced  
electrochemical sensing platform for luteolin determination  
in peanut shells

Rongqian Meng <sup>a,b</sup>, Yanfeng Xue <sup>a</sup>, Lijun Guo <sup>a</sup>, Hong Yang <sup>a,b</sup>, Yongbo Song<sup>a</sup>,  
Qiaoling Li <sup>c \*</sup> and Yulan Niu <sup>a\*</sup>

a Department of Chemistry and Chemical Engineering, Taiyuan Institute of  
Technology, Taiyuan 030008, China

b School of Chemical Engineering and Technology, North University of China,  
Taiyuan 030051, China

c School of Science, North University of China, Taiyuan 030051, China

\*Corresponding authors

Prof. Qiaoling Li, E-mail: qiaolingl@163.com

Prof. Yulan Niu, E-mail: Niuyul@tit.edu.cn

### 2.4 Optimization of Preparation of oPPy/oPEDOT/GQDs-CS/GCE

Table. S1 BBD experimental factors and levels for optimization of composite electrode  
preparation conditions

|   | mass ratio of CS : GQDs<br>(A) | polymerization cycle<br>number of EDOT (B) | polymerization cycle<br>number of Py (C) |
|---|--------------------------------|--------------------------------------------|------------------------------------------|
| 1 | 2                              | 4                                          | 4                                        |
| 2 | 5                              | 8                                          | 8                                        |
| 3 | 8                              | 12                                         | 12                                       |

### 3.2 Optimization of preparation conditions of oPPy/oPEDOT/GQDs-CS/GCE

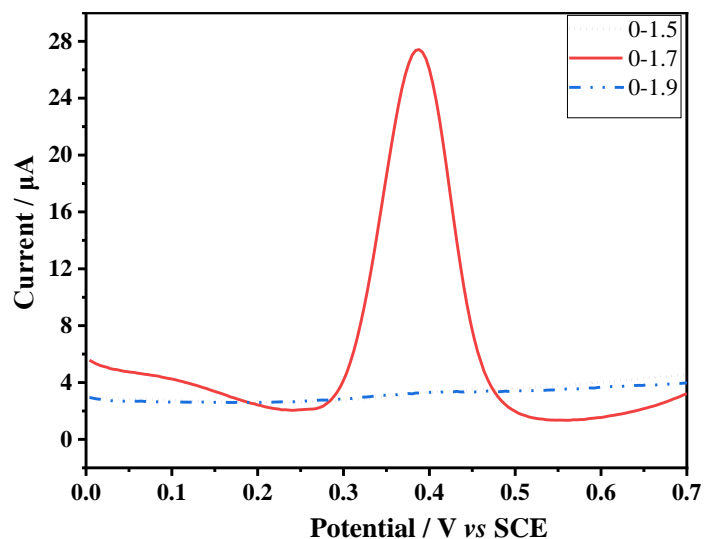

Fig. S1 DPV curves of 10  $\mu\text{M}$  luteolin on oPPy/oPEDOT/GQDs-CS/GCE prepared with different electropolymerization range after incubation in NaOH-EtOH solution (1:1).

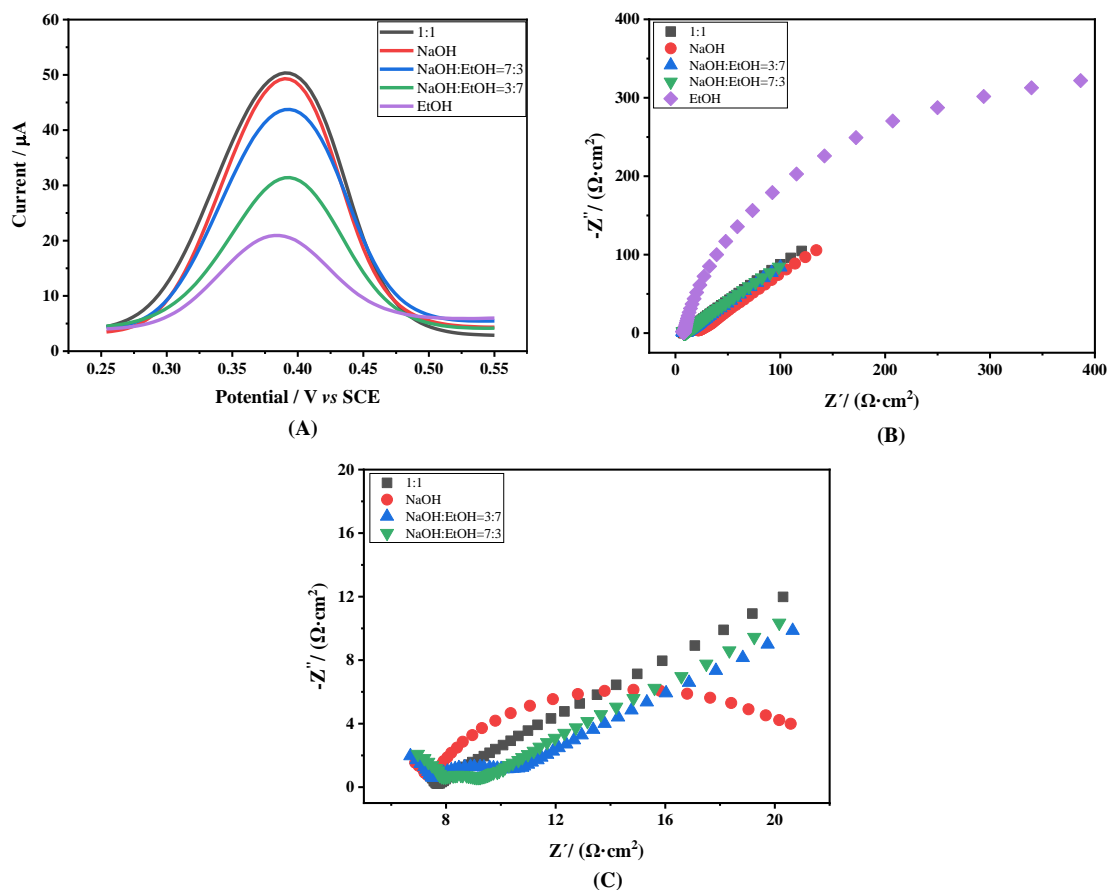

Fig. S2 (A) DPV diagrams of 10  $\mu\text{M}$  luteolin solution and (B) EIS of 5.0 mM  $[\text{Fe}(\text{CN})_6]^{3-/4-}$  solution containing 0.10 M KCl on oPPy/oPEDOT/GQDs-CS /GCE after incubation in solution

with different volume ratios; (C) Effect of incubation time on DPV peak current of luteolin solution on composited electrode.

Fig. S2-A showed the DPV curves of luteolin solution detected by oPPy/oPEDOT/GQDs-CS/GCE after incubation in different volume ratios of 0.2mol/L sodium hydroxide and ethanol solution for 30 min to detect luteolin solution. When the incubation solution was ethanol, the peak current of the composite electrode to luteolin was the smallest. With the increase of the volume ratios of NaOH solution in the incubation solution, the peak current of the electrode to luteolin gradually increased. When the volume ratio of ethanol reached 7:3, the peak current decreased, but was still larger than the peak current of 3:7, indicating that incubation in NaOH solution could help to improve the electrocatalytic ability of the composite electrode to luteolin. The peak current of the composite electrode after incubation in NaOH solution was close to that of the electrode incubated NaOH : EtOH solution with the volume ratio of 1:1. In order to further determine incubation solution, the EIS of the composite electrode after incubation in different solution was investigated in Fig.S2-B.

The EIS of the composite electrode after incubation in ethanol had the largest semicircle diameter in the high frequency region, that is, the largest resistance, with a  $R_{ct}$  of  $567.8 \Omega \cdot \text{cm}^2$ , followed by the composite electrode incubated in NaOH incubation solution, with a  $R_{ct}$  of  $34.9 \Omega \cdot \text{cm}^2$ , while that of the composite electrode are almost a straight line after incubation in NaOH-EtOH solution with the volume ratio of 3:7, 1:1 and 7:3, and the  $R_{ct}$  values is 18.9, 11.4 and  $16.3 \Omega \cdot \text{cm}^2$ , respectively. With the increase of the volume of NaOH solution in the incubation solution, the smaller the resistance of the composite electrode was, the stronger the electrocatalytic ability was. However, the resistance of the composite electrode increased instead after incubation in NaOH solution. This may be because the excessive amount of sodium hydroxide will lead to the generation of more overoxidized groups in PEDOT and PPy, which will enhance the electronegativity of the polymer, thus repelling the negatively charged  $[\text{Fe}(\text{CN})_6]^{3-}$  probe in the charge transfer on the electrode surface. Combined with DPV analysis,

NaOH-EtOH with a volume ratio of 1:1 was selected as the incubation solution for the composite electrode.

As can be seen from Fig.S2-C, with the increase of incubation time, the DPV peak current of luteolin gradually increased. The peak current reached the maximum after incubated for 30min, and then decreased significantly. Therefore, 30min was selected as the optimum incubation time.

### 3.5 Anti-interference, repeatability and stability

High performance liquid chromatography (HPLC) method was carried out for the luteolin content analysis in samples to further verify the results based on the constructed sensor. The mobile phase was comprised of methanol (A) and 0.2% acetic acid (B) with the flow rate of 1mL/min at 30°C. The gradient elution conditions were as follows: 5% A at 0 ~ 5min, 5-30% A at 5~30min, 30-50% A at 30~60min, 50-80% A at 60~70min. The sample injection volume was set at 5  $\mu$ L, and fractions was monitored at 294 nm.

Table S2 Calculation results of main components in peanut shell

| Component | Peak area of sample solution | Peak area of standard solution | Concentration of standard solution( $10^{-4}$ mol/L) | Component concentration in sample solution( $\mu$ mol/L) | C/C <sub>Lu</sub> |
|-----------|------------------------------|--------------------------------|------------------------------------------------------|----------------------------------------------------------|-------------------|
| CA        | 89.6556                      | 10528.9215                     | 2.2518                                               | 1.9174                                                   | 0.0403            |
| IA        | 46.0246                      | 1186.6781                      | 0.7641                                               | 2.9635                                                   | 0.0624            |
| Er        | 141.7992                     | 3290.4433                      | 1.3839                                               | 5.9637                                                   | 0.1255            |
| Lu        | 850.5608                     | 4947.9965                      | 2.7648                                               | 47.5268                                                  | 1                 |
